# Supplementary material
Source: PubMed Central journal article supplement (PMC7205994)

Supplementary Figure 1: *Siva* is not regulated by p53 family members during development

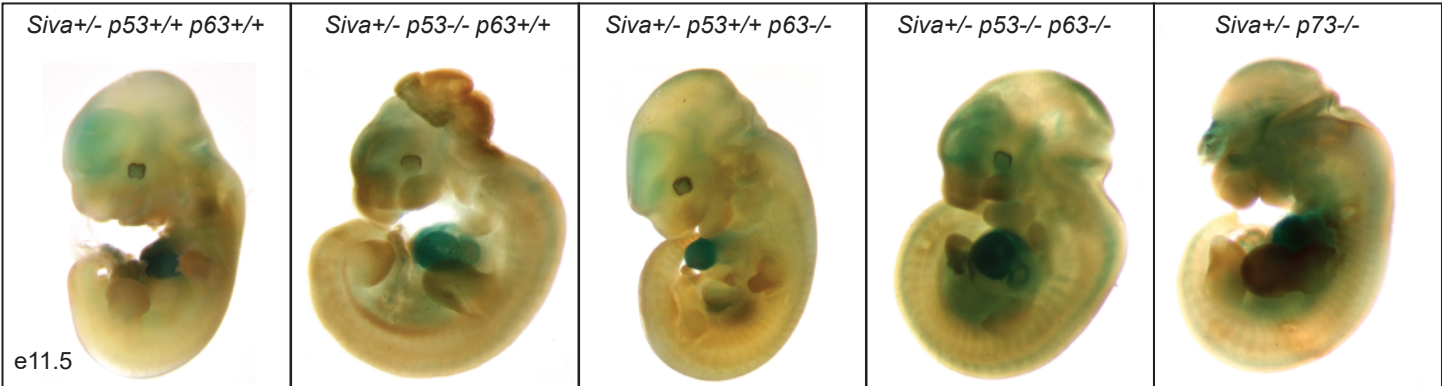

Supplement: 41418_2019_358_MOESM1_ESM.pdf [file 41418_2019_358_MOESM1_ESM.pdf]

Supplementary Figure 2: *Siva*-null embryos have delayed, but otherwise normal, heart development

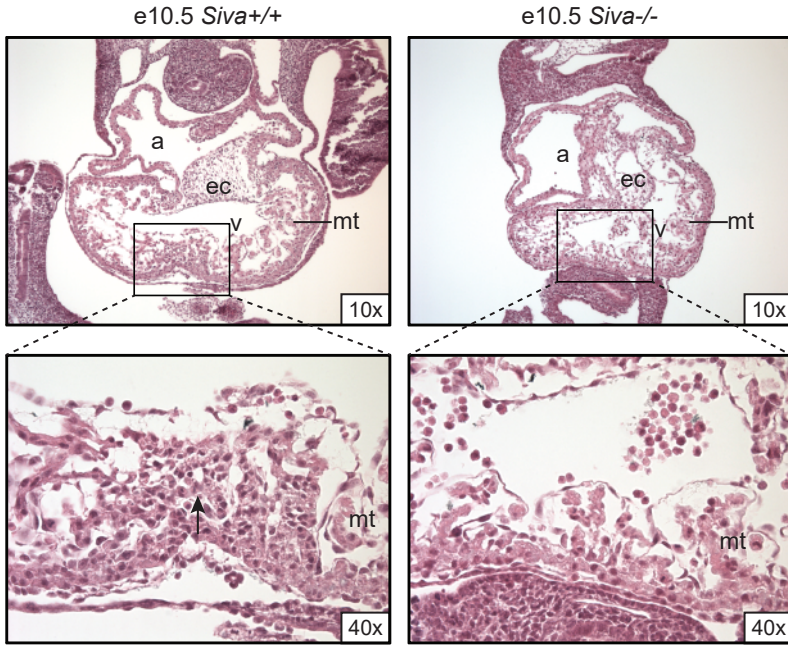

Supplement: 41418_2019_358_MOESM2_ESM.pdf [file 41418_2019_358_MOESM2_ESM.pdf]

Supplementary Figure 3: Embryonic vasculature develops normally in the absence of *Siva*

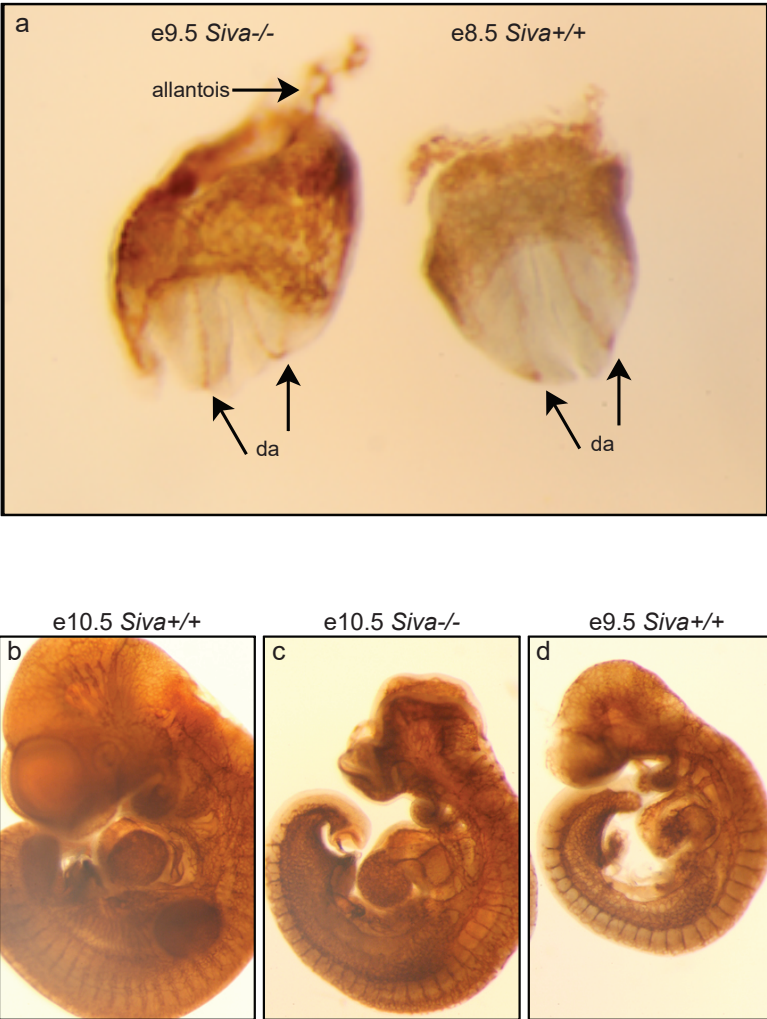

Supplement: 41418_2019_358_MOESM3_ESM.pdf [file 41418_2019_358_MOESM3_ESM.pdf]

Supplementary Figure 4: *p53* loss does not rescue phenotypes induced by *Siva* deficiency

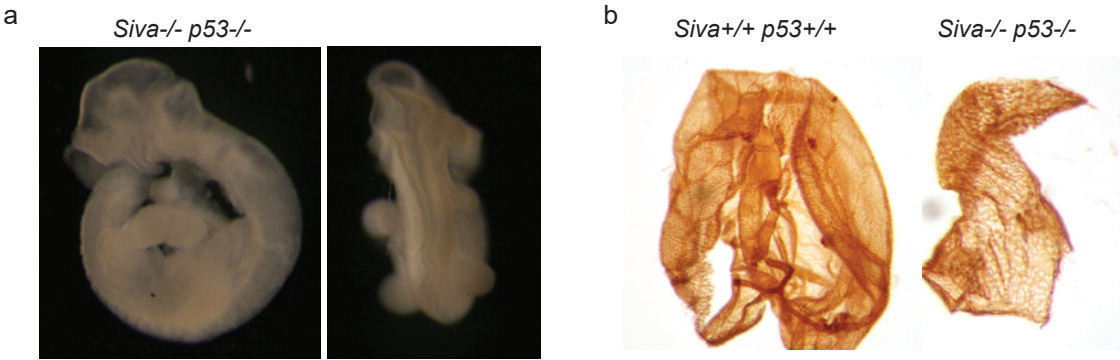

Supplement: 41418_2019_358_MOESM4_ESM.pdf [file 41418_2019_358_MOESM4_ESM.pdf]

Supplementary Figure 5: *Siva*-null embryonic phenotypes are not rescued by *Ripk3* loss

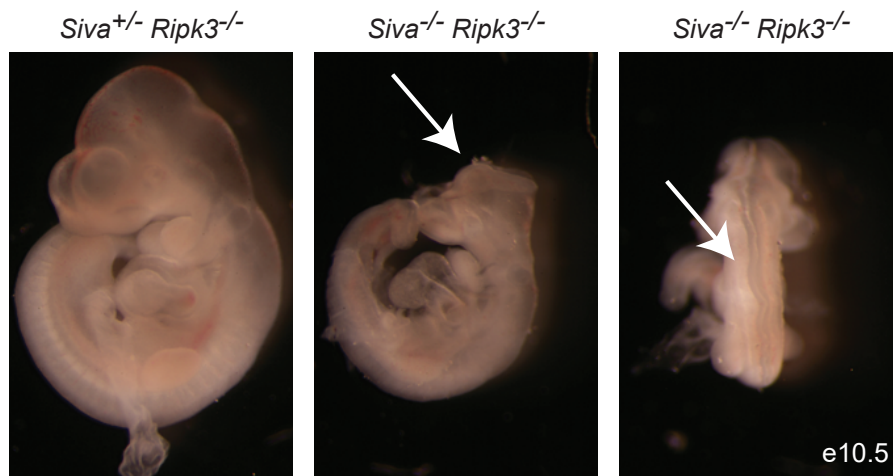

Supplement: 41418_2019_358_MOESM5_ESM.pdf [file 41418_2019_358_MOESM5_ESM.pdf]
